# Supplementary material for: Modulation of the nutritional and functional values of common bean by farming system: organic vs. conventional
Source: Frontiers journal article supplement (doi:10.3389/fsufs.2023.1282427), 2024-01-04
Supplement: Image_3.pdf [file Image_3.pdf]

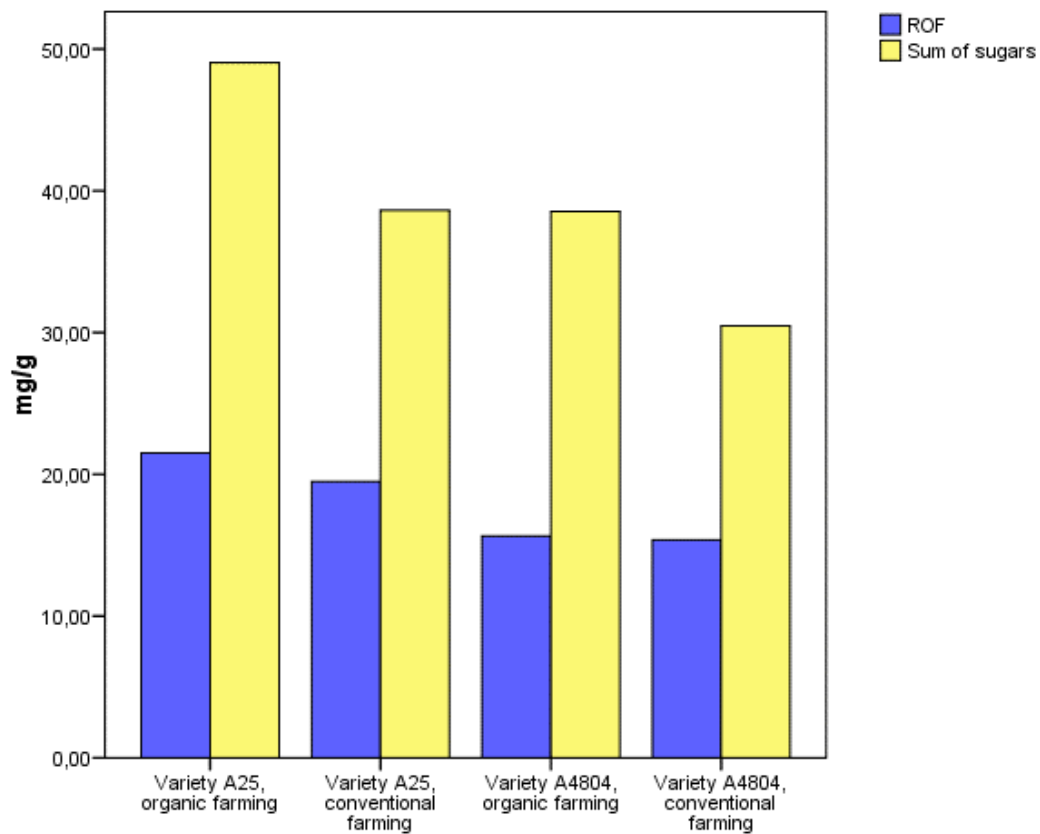

Supplementary Figure 3. Sum of raffinose oligosaccharides (ROFs: stachyose, raffinose and verbascose) and sum of sugars (sucrose, stachyose, raffinose and verbascose) in common beans cultivated under organic and conventional conditions.
